# Supplementary material
Source: HighWire-hosted journal article supplement (https://bmjopen.bmj.com/content/12/3/e060234)
Supplement: inline-supplementary-material-1 [file inline-supplementary-material-1.pdf]

## Supplementary appendix 1

### Overview of search strategies used for each database

#### MEDLINE (Ovid) search strategy filtered by date from 1 January 1992 to 31 December 2021

- 
1. asylum seekers.af.
  2. forced migration.af.
  3. migration.af.
  4. immigration.af.
  5. 1 or 2 or 3 or 4
  6. immigration detention.af.
  7. (community detention or residence determination).af.
  8. (offshore detention or offshore immigration detention or offshore processing).af.
  9. (community based or community-based).af.
  10. (onshore immigration detention or onshore detention).af.
  11. 6 or 7 or 8 or 9 or 10
  12. (self harm or self injur\* or non suicid\* or self inflict\* or self wound\* or parasuicid\* or para suicid\* or self poison\* or overdos\* or self mutilat\* or self cut\* or self batter\* or self scratch\* or self burn\* or self immolat\* or DSH or NSSI).af.
  13. 5 and 12
  14. 11 and 12
- 

#### PsycINFO (Ovid) search strategy filtered by date from 1 January 1992 to 31 December 2021

- 
1. asylum seekers.af.
  2. forced migration.af.
  3. migration.af.
  4. immigration.af.
  5. 1 or 2 or 3 or 4
  6. immigration detention.af.
  7. (community detention or residence determination).af.
  8. (offshore detention or offshore immigration detention or offshore processing).af.
  9. (community based or community-based).af.
  10. (onshore immigration detention or onshore detention).af.
  11. 6 or 7 or 8 or 9 or 10
  12. (self harm or self injur\* or non suicid\* or self inflict\* or self wound\* or parasuicid\* or para suicid\* or self poison\* or overdos\* or self mutilat\* or self cut\* or self batter\* or self scratch\* or self burn\* or self immolat\* or DSH or NSSI).af.
  13. 5 and 12
  14. 11 and 12
- 

#### PubMed search strategy filtered by date from 1 January 1992 to 31 December 2021

```

((((((((((((((((("asylum seekers") OR ("forced migration")) OR (immigration)) OR
("immigration detention")) OR ("community detention")) OR ("offshore detention"))
AND ("self-harm")) OR ("self harm")) OR ("self-injury")) OR ("self injury")) OR (self
harming behaviours)) OR ("self poisoning")) OR (overdose)) OR ("self mutilation")) OR
(cutting)) OR ("self battery")) OR ("non suicidal self injury")) OR ("deliberate self
harm")) OR ("self immolation")) OR (self wound)

```

**Scopus search strategy**

{asylum seekers} OR {forced migration} OR immigration AND detention OR {immigration detention} OR {offshore processing} OR {community-based} OR {community detention} OR {asylum seeker population} AND {self harm} OR {self-harm} OR {self injury} OR {self-injury} OR {self-harming behaviours} OR {self wound} OR {self poisoning} OR overdose OR {self mutilation} OR cut OR {self battery}
